# Supplementary material for: Reduction in Migratory Phenotype in a Metastasized Breast Cancer Cell Line via Downregulation of S100A4 and GRM3
Source: PubMed Central journal article supplement (PMC5471271; doi:10.1038/s41598-017-03811-9), 2017-06-14
Supplement: 41598_2017_3811_MOESM1_ESM.pdf [file 41598_2017_3811_MOESM1_ESM.pdf]

## Supplementary Information

### Reduction in Migratory Phenotype in a Metastasized Breast Cancer Cell Line via Downregulation of S100A4 and GRM3

Andy Chen<sup>1</sup>, Luqi Wang<sup>2,3</sup>, Bai-Yan Li<sup>3</sup>, Jesse Sherman<sup>2</sup>, Jong E. Ryu<sup>4</sup>, Kazunori Hamamura<sup>5</sup>, Yunlong Liu<sup>6</sup>, Harikrishna Nakshatri<sup>7</sup>, and Hiroki Yokota<sup>2</sup>

<sup>1</sup>Weldon School of Biomedical Engineering, Purdue University, West Lafayette, IN 47907, USA

<sup>2</sup>Department of Biomedical Engineering, Indiana University Purdue University Indianapolis, Indianapolis, IN 46202, USA

<sup>3</sup>Department of Pharmacology, School of Pharmacy, Harbin Medical University, Harbin 150081, China

<sup>4</sup>Department of Mechanical Engineering, Indiana University Purdue University Indianapolis, Indianapolis, IN 46202, USA

<sup>5</sup>Department of Pharmacology, School of Dentistry, Aichi-Gakuin University, Nagoya, Japan

<sup>6</sup>Department of Medical and Molecular Genetics, Indiana University School of Medicine, Indianapolis, IN, USA

<sup>7</sup>Department of Surgery, Simon Cancer Research Center, Indiana University School of Medicine, Indianapolis, IN 46202, USA

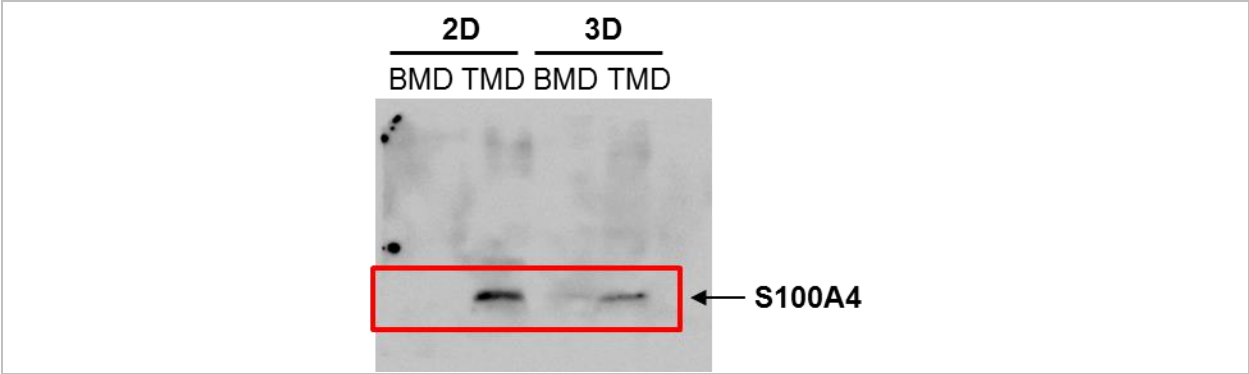

**Supplementary Figure 1.** Western blot gel image in Figure 2E.

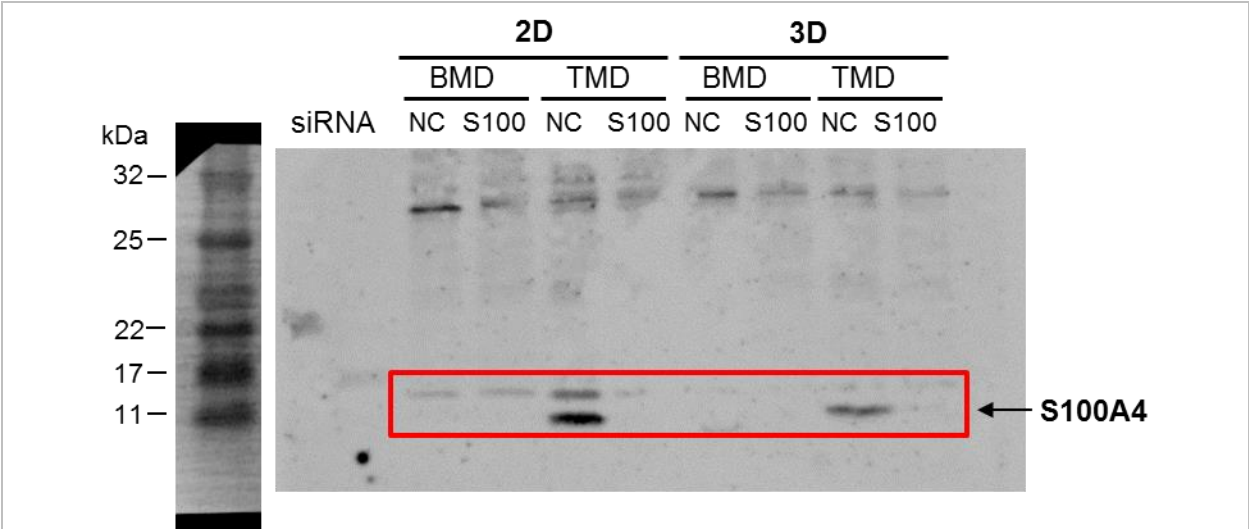

**Supplementary Figure 2.** Western blot gel image in Figure 3B.

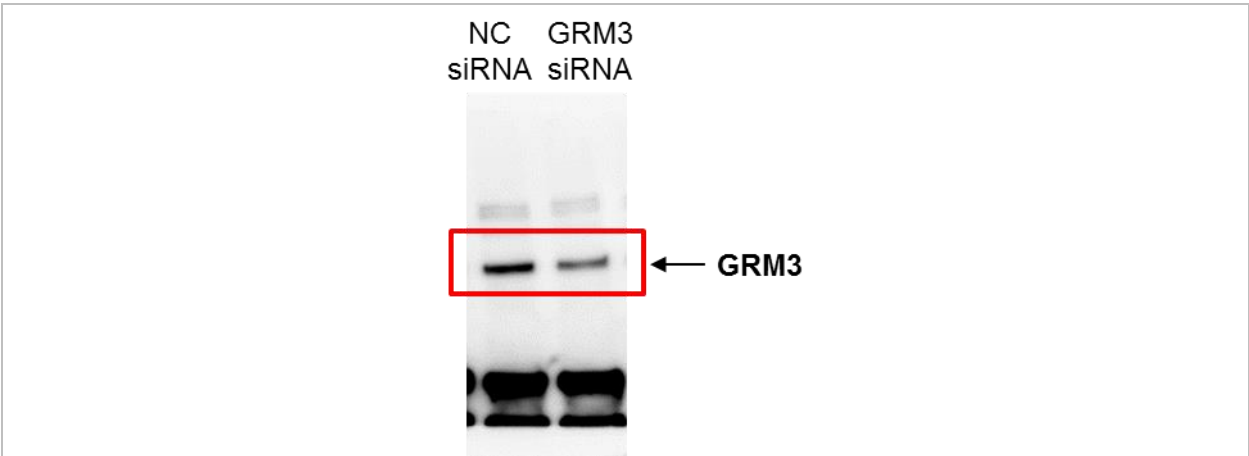

**Supplementary Figure 3.** Western blot gel image in Figure 4B.

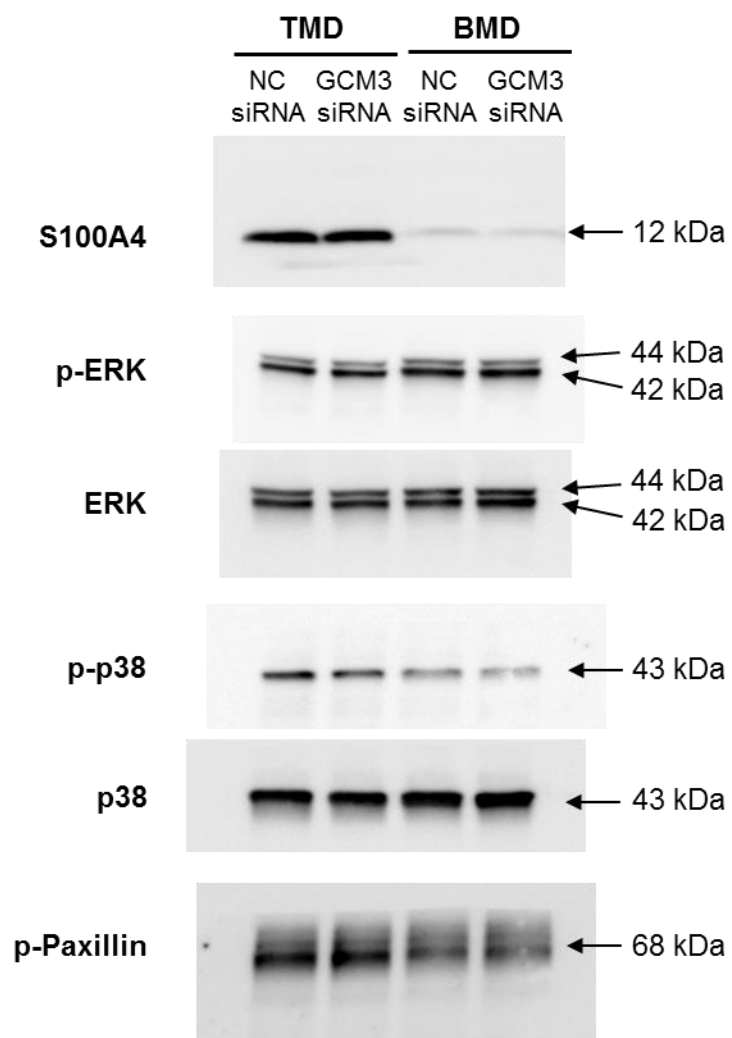

**Supplementary Figure 4.** Western blot gel image in Figure 4G.
